# Supplementary material for: Identifying clusters of cis-regulatory elements underpinning TAD structures and lineage-specific regulatory networks
Source: HighWire-hosted journal article supplement (doi:10.1101/gr.248658.119), 2019-09-18
Supplement: Supplemental_Material.docx [file Supplemental_Material.docx]

**Supplemental_Table_S1.** Number of TR-COREs identified by CREAM for transcription regulators with ChIP-Seq data in ENCODE project for GM12878 and K562 and more than 100 TR-COREs.

| GM12878 | | K562 | |
| --- | --- | --- | --- |
| transcription regulator | Average number of TR-COREs among replicates | transcription regulator | Average number of TR-COREs among replicates |
| RUNX3 | 1334 | MAFK | 904 |
| CTCF | 1284 | MAFF | 732 |
| ZNF143 | 843 | JUND | 685 |
| EBF1 | 793 | ZNF143 | 673 |
| CMYC | 767 | TEAD4 | 657 |
| RAD21 | 693 | RAD21 | 646 |
| EBF | 677 | CTCF | 568 |
| STAT1 | 593 | PU1 | 544 |
| YY1 | 564 | ELF1 | 514 |
| MTA3 | 531 | MAX | 498 |
| BATF | 428 | HDAC2 | 494 |
| TCF12 | 397 | CBX3 | 481 |
| STAT5 | 388 | CCNT2 | 477 |
| P300 | 385 | BHLHE40 | 470 |
| BCL3 | 384 | HCFC1 | 463 |
| ATF2 | 382 | ZNF384 | 463 |
| PAX5 | 376 | IRF1 | 456 |
| FOXM1 | 375 | SMC3 | 450 |
| PU1 | 371 | TBLR1 | 446 |
| NFIC | 368 | CEBPB | 442 |
| BCLAF1 | 340 | CMYC | 429 |
| NFATC1 | 339 | NRSF | 423 |
| PML | 321 | CDPS | 403 |
| TCF3 | 295 | P300 | 378 |
| SP1 | 272 | ZNFMIZ | 376 |
| ELF1 | 236 | NR2F2 | 364 |
| IRF4 | 232 | ARID3A | 362 |
| IKZF1 | 189 | EGR1 | 352 |
| POU2F2 | 178 | RFX5 | 347 |
| BCL11 | 177 | ZBTB7 | 338 |
| TAF1 | 168 | HEY1 | 321 |
| POL2 | 165 | COREST | 313 |
| MEF2 | 162 | PML | 308 |
| ZEB1 | 156 | ATF1 | 305 |
| PBX3 | 150 | MAZ | 276 |
| NFE2 | 138 | CJUN | 244 |
| CREB1 | 134 | CHD2 | 243 |
| SRF | 132 | CEBPD | 236 |
| CEBPB | 129 | USF1 | 226 |
| EGR1 | 109 | MXI1 | 219 |
| NRSF | 106 | ZC3H1 | 218 |
| NFKB | 103 | TRIM28 | 209 |
|  |  | E2F6 | 208 |
|  |  | NFYB | 205 |
|  |  | STAT5 | 203 |
|  |  | YY1 | 198 |
|  |  | KAP1 | 189 |
|  |  | ELK1 | 187 |
|  |  | POL2 | 180 |
|  |  | GABP | 156 |
|  |  | ATF3 | 156 |
|  |  | HMGN3 | 154 |
|  |  | GATA2 | 153 |
|  |  | BACH1 | 151 |
|  |  | TAF1 | 148 |
|  |  | SIN3 | 145 |
|  |  | ETS1 | 139 |
|  |  | GTF2 | 129 |
|  |  | FOSL1 | 110 |
|  |  |  |  |

**
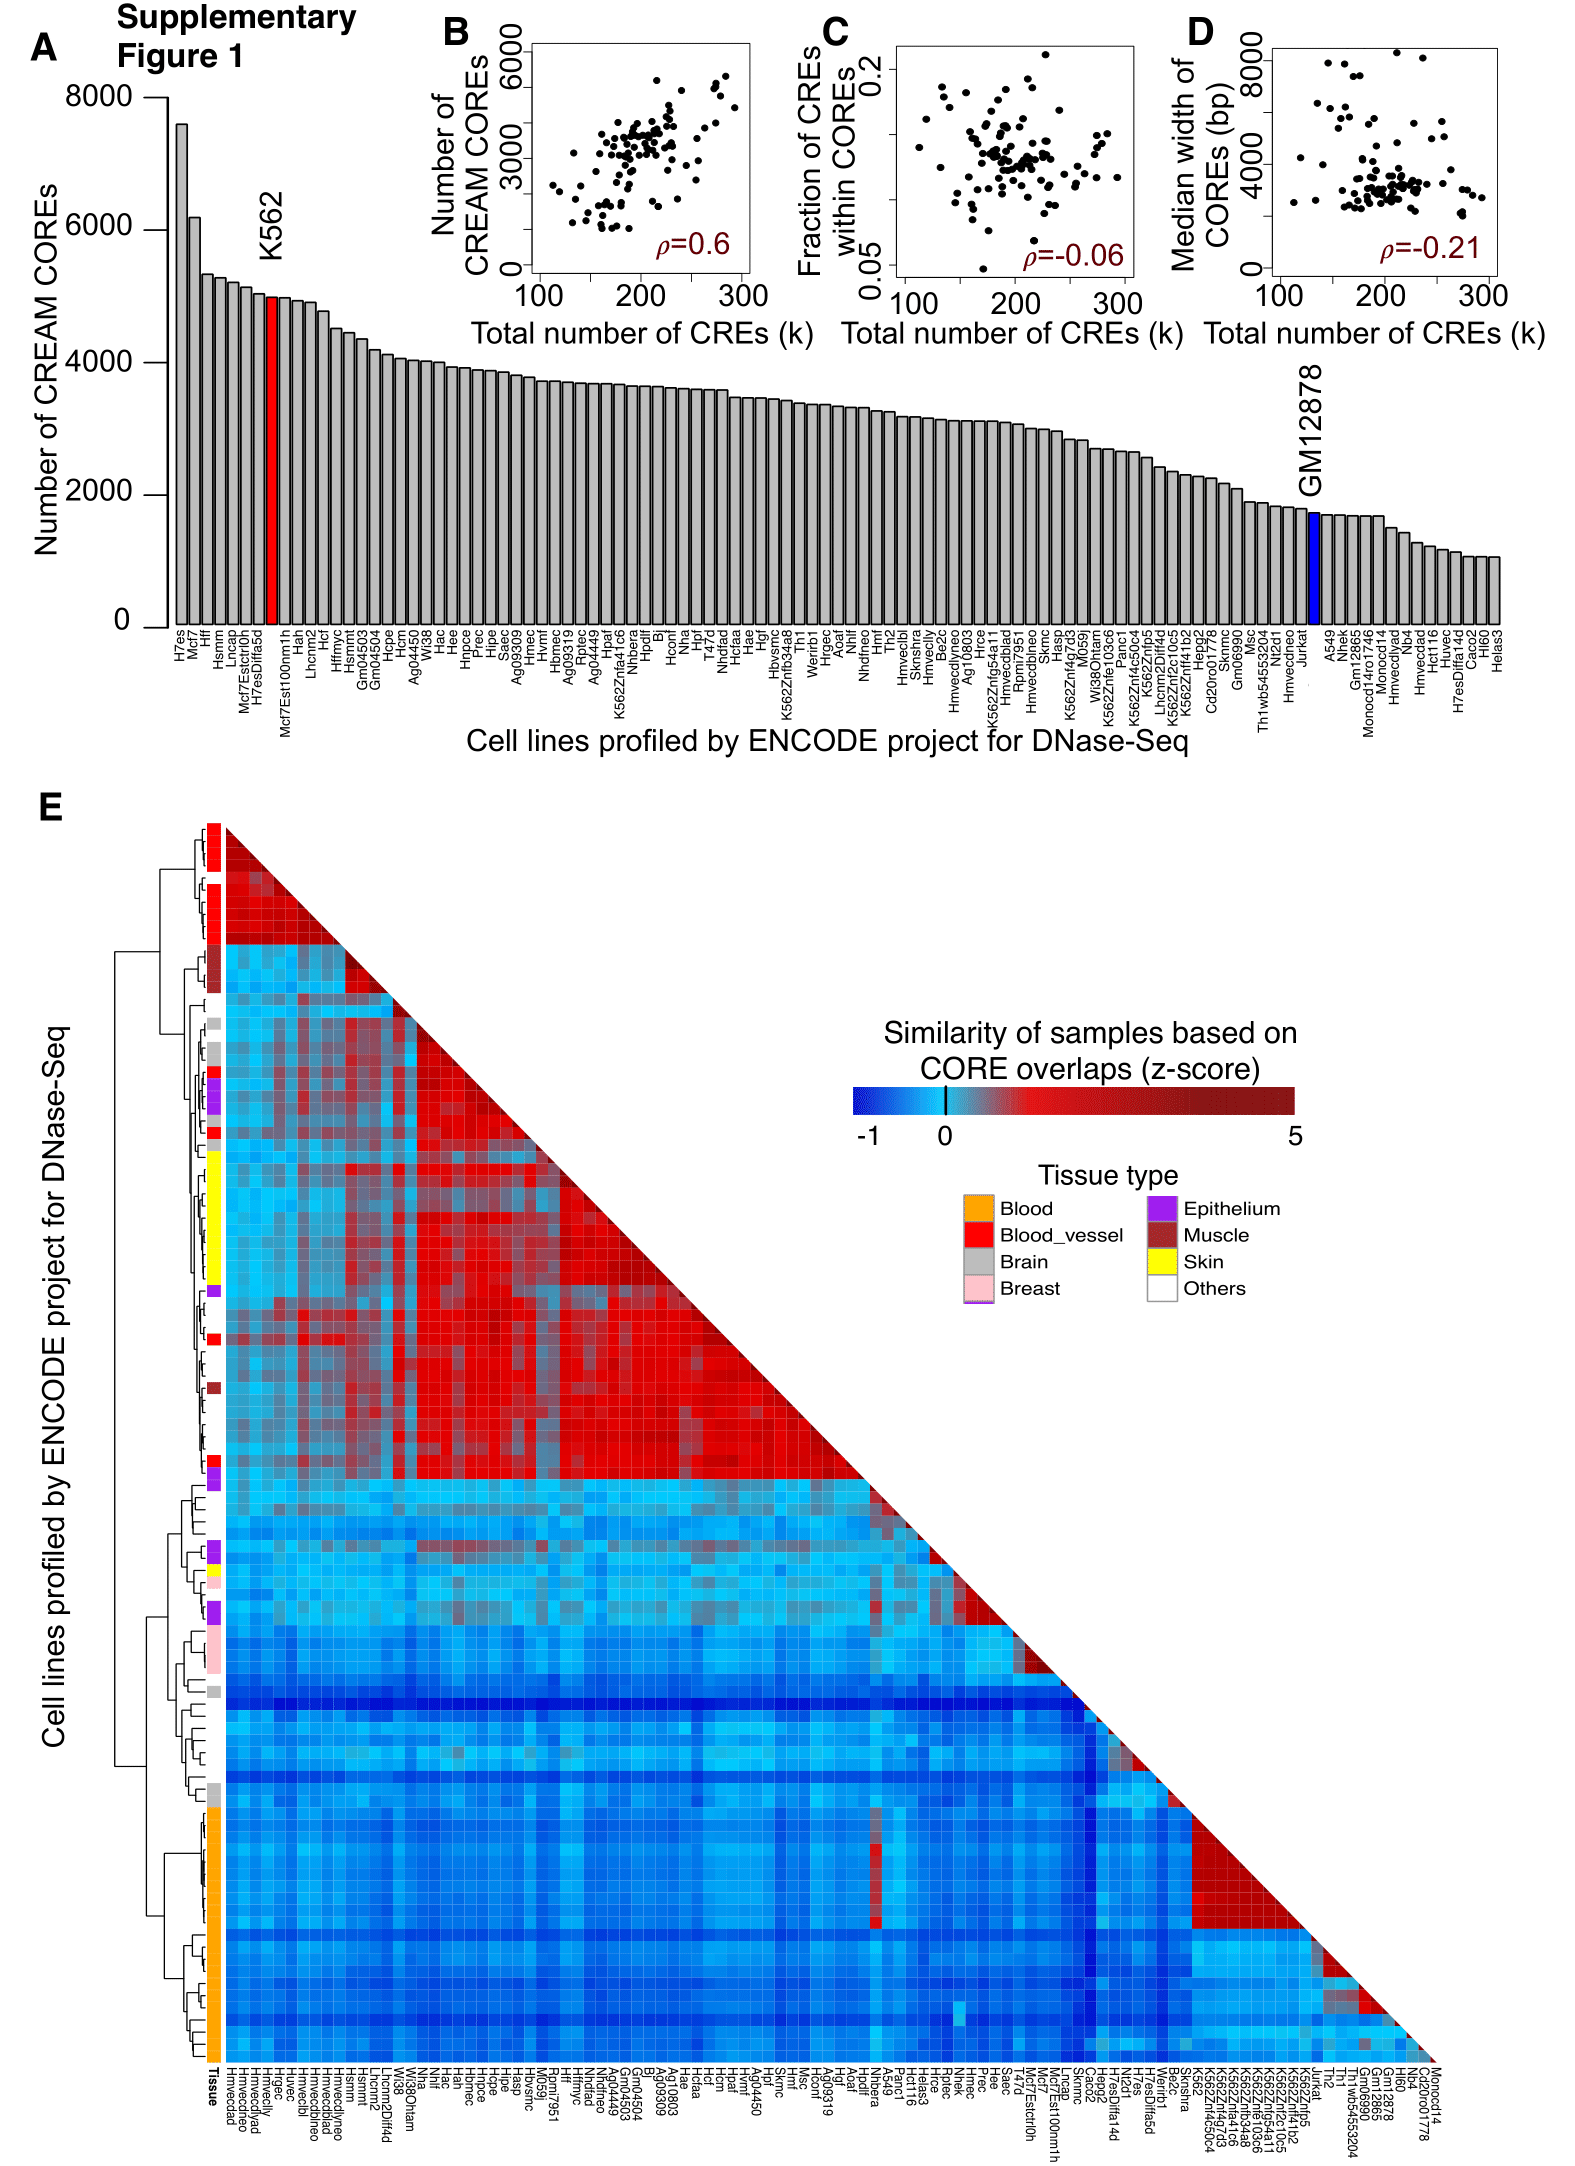
**

**Supplemental_Fig_S1*.* Specificity of COREs to the cell types in ENCODE.** **(*A*)** Number of COREs identified by CREAM for each cell or tissue previously profiled by the ENCODE project for DNase-seq. **(*B*)** Positive correlation in the number of COREs with the number of individual CRE per sample. **(C)** Independence in the fraction of CREs called within COREs versus the number of individual CRE per sample. **(*D*)** Relation between median width of COREs and the number of individual CRE per sample. **(*E*)** Heatmap of similarities based on CREAM-identified COREs across the ENCODE project cells or tissue samples based on Jaccard index of overlap in COREs.


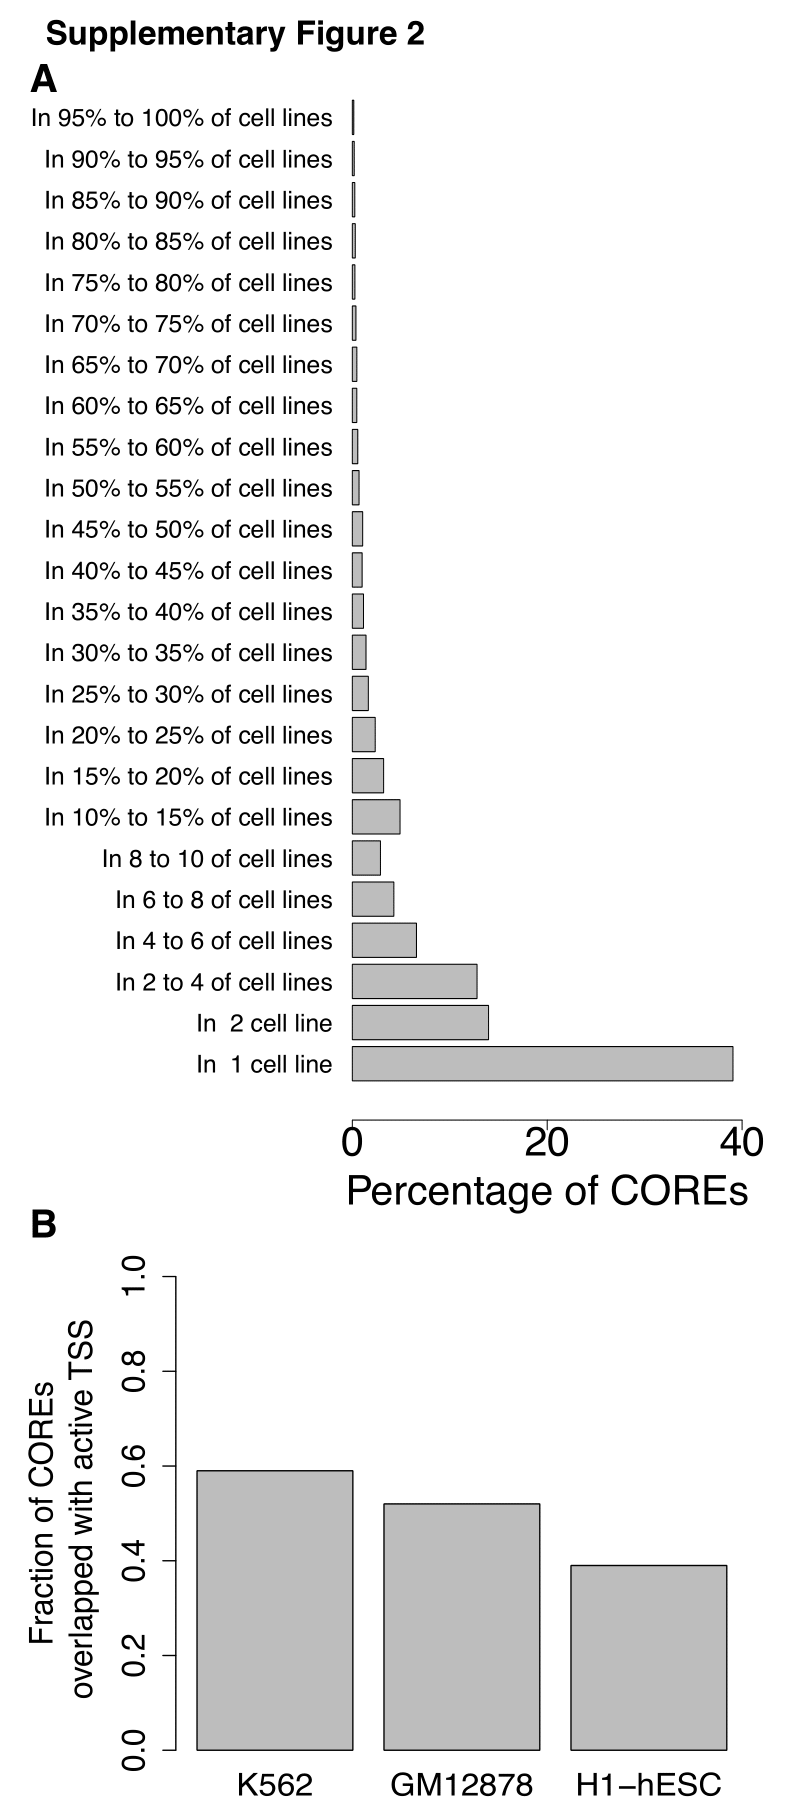


**Supplemental_Fig_S2. (*A*)** Percentage of COREs shared between different percentage of cell lines with available DNaseI profiles in The ENCODE Project Consortium **(*B*)** Fraction of COREs overlapped with active TSS in GM12878, K562 and H1-hESC cell lines.

**
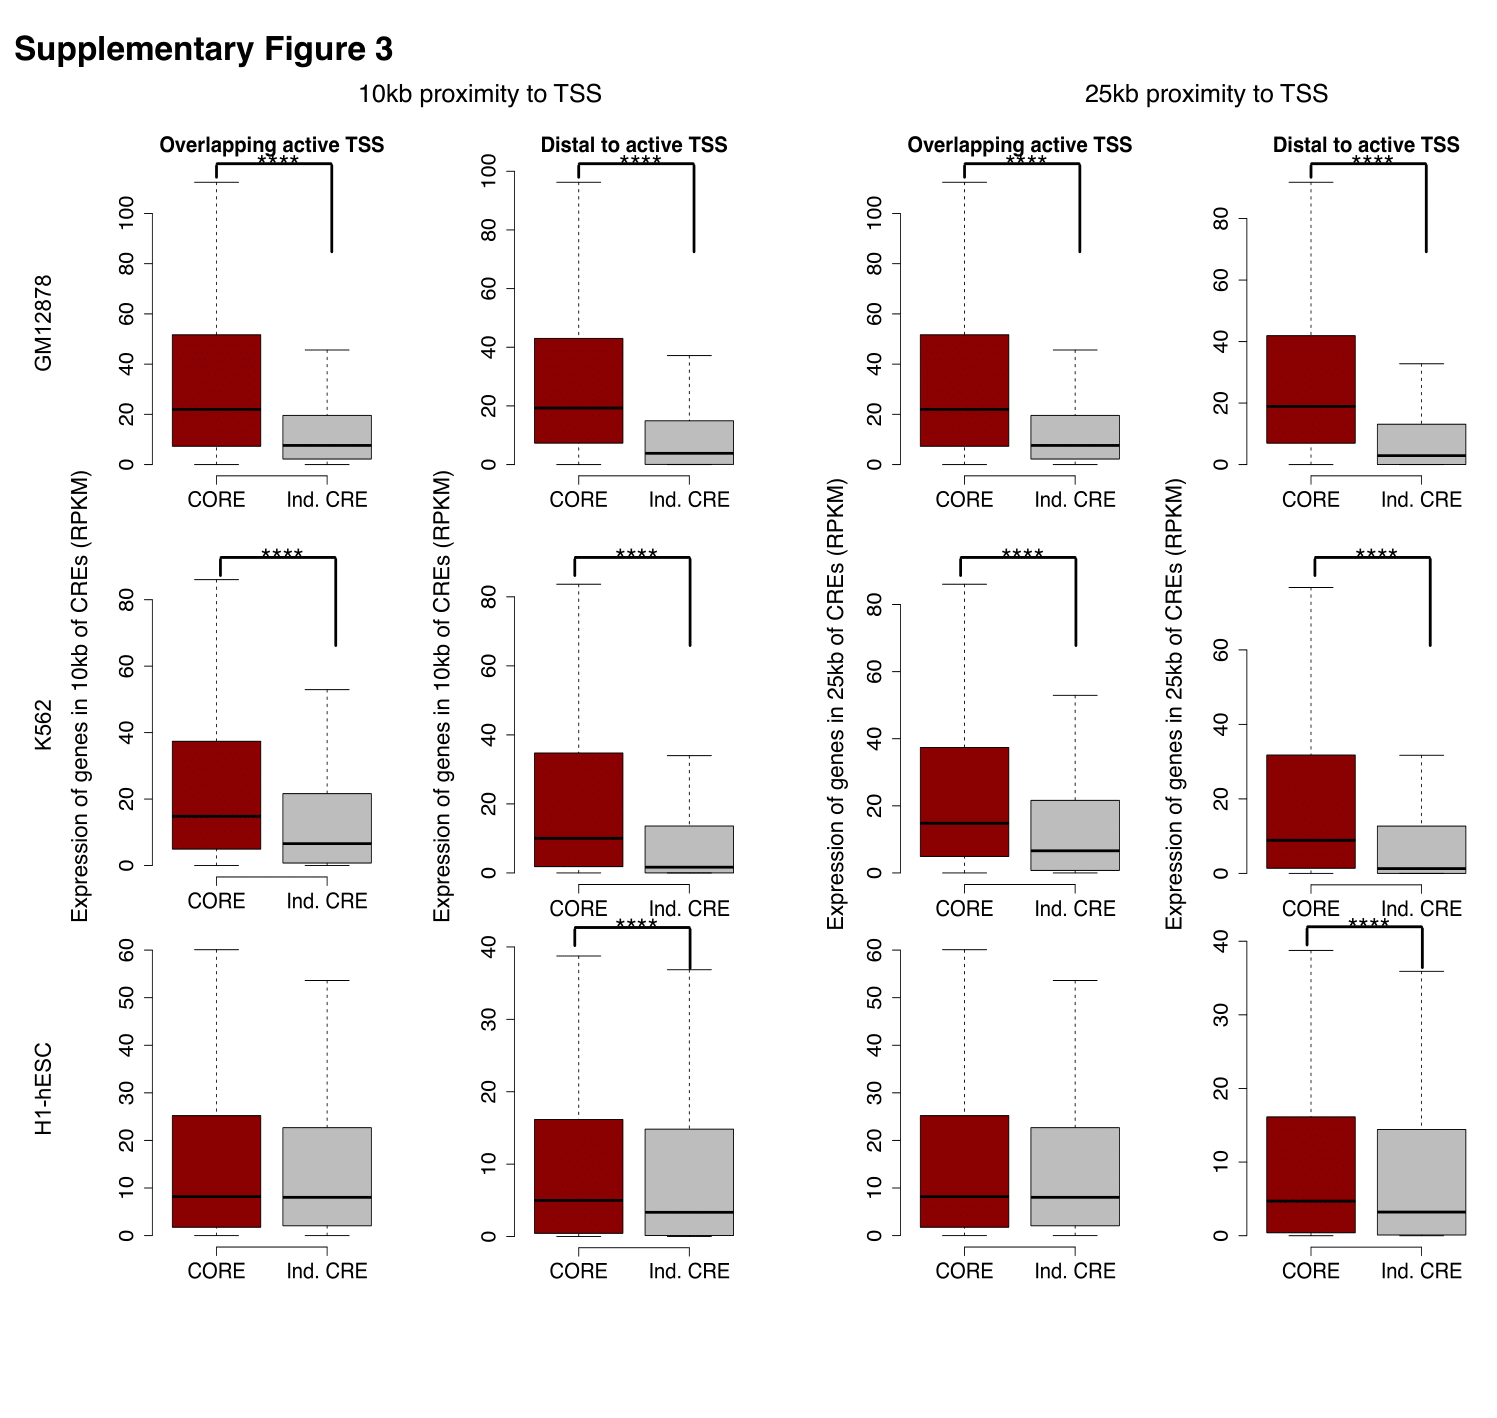
**

**Supplemental_Fig_S3.** Expression of genes in 10kb and 25kb proximity of individual CREs or COREs categorized as either overlapping or distal to active TSS in GM12878, K562 and H1-hESC cell lines.

**
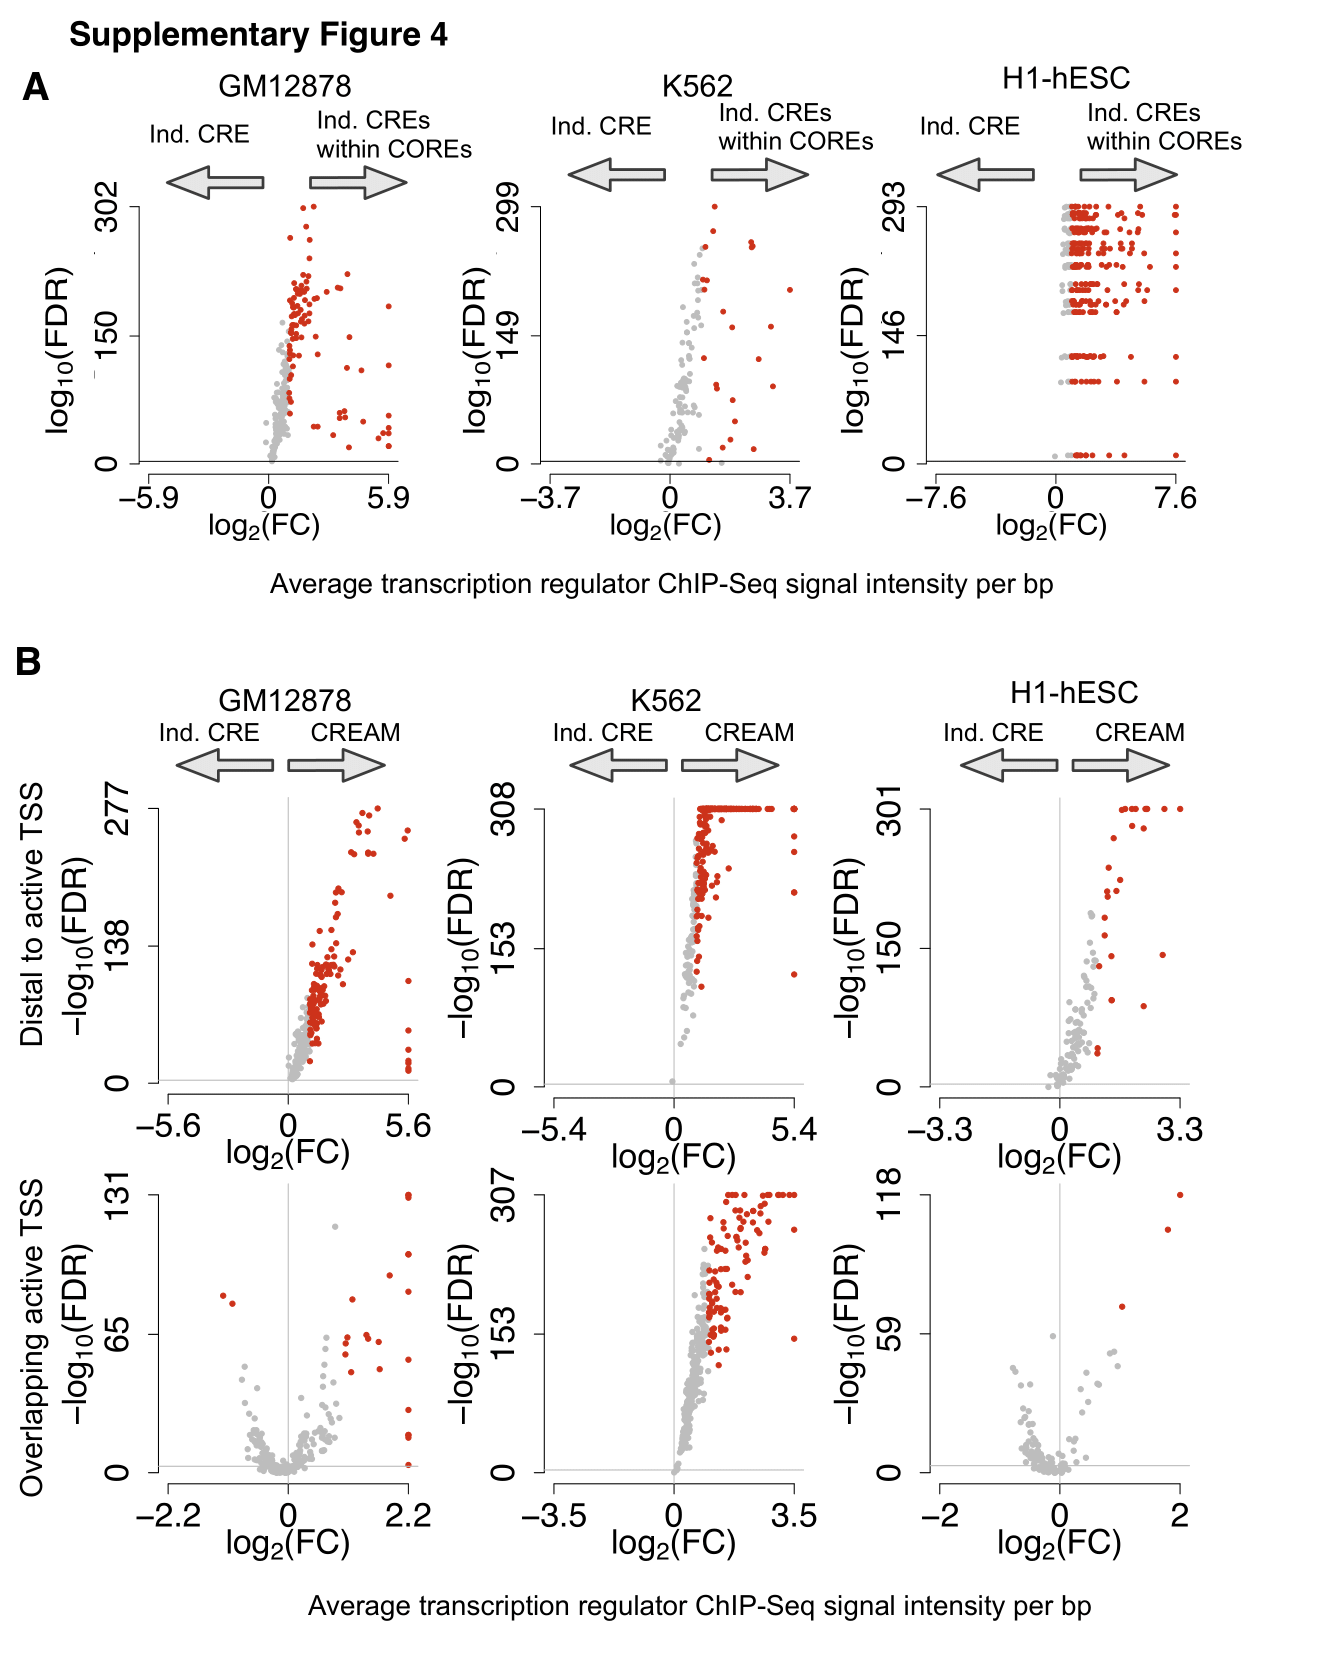
**

**Supplemental_Fig_S4. (*A*)** Enrichment of transcription regulator binding intensity from ChIP-seq data in COREs excluding the CRE-free gaps compared to individual CREs. **(*B*)** Enrichment of transcription regulator binding intensity from ChIP-seq data in COREs versus individual CREs categorized as either overlapping or distal to active TSS in GM12878, K562 and H1-hESC cell lines.


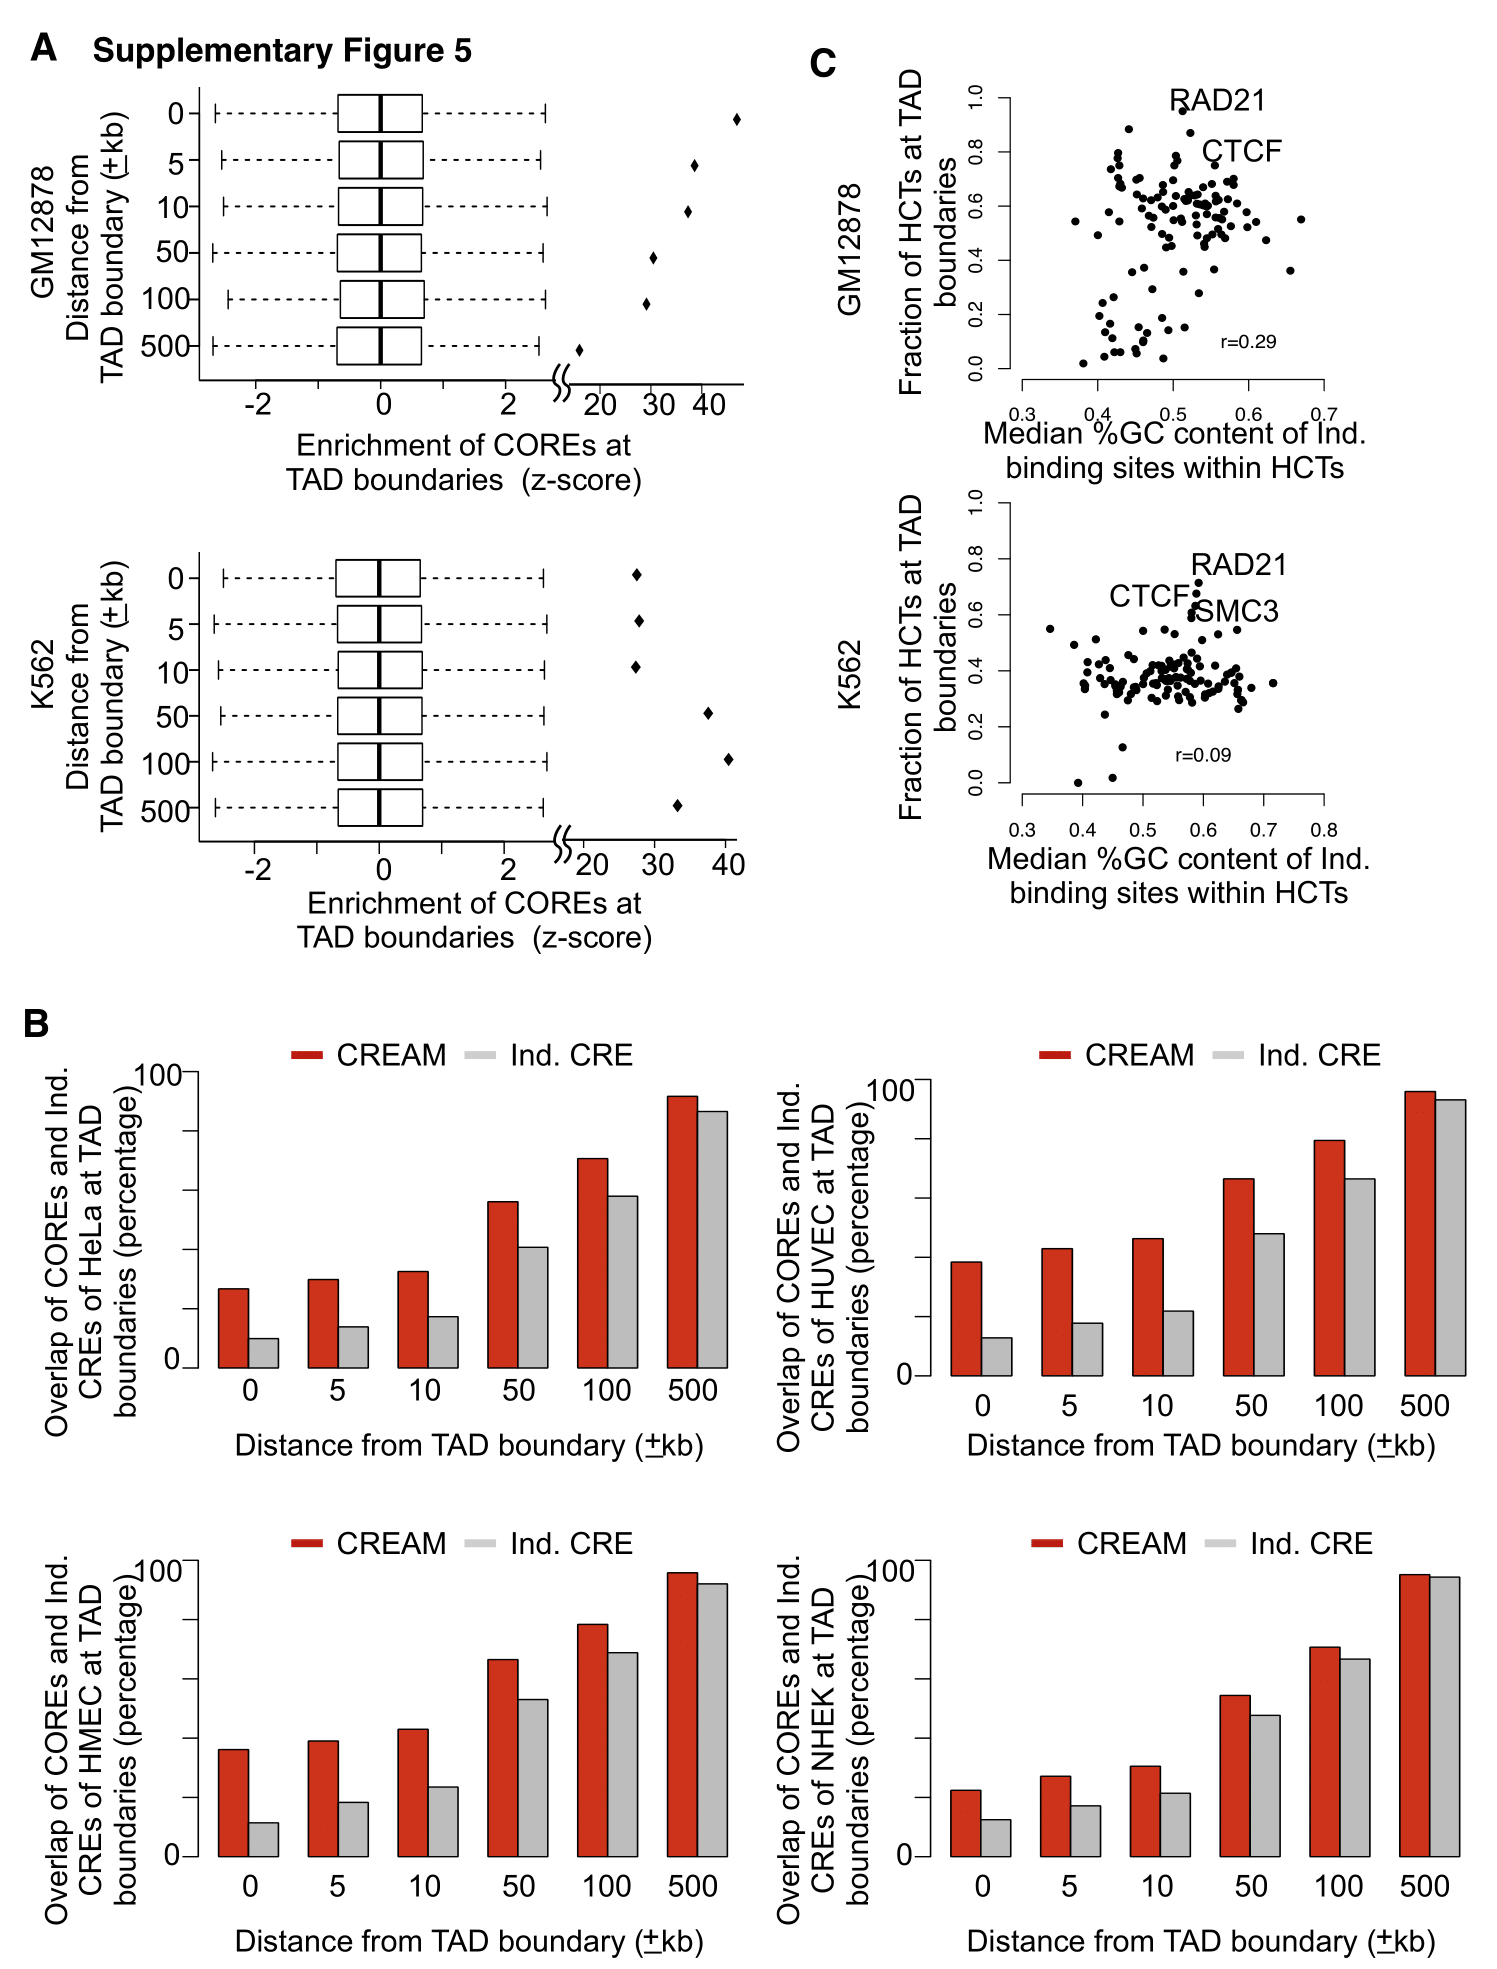


**Supplemental_Fig_S5. *(A)*** Permutation test assessing the significance of the enrichment of COREs at TAD boundaries across a range of distance cutoffs around TAD boundaries (0-500kb). ***(B)*** Enrichment of COREs and individual CREs at TAD boundaries in HeLa, HMEC, HUVEC, and NHEK cells. ***(C)*** Relationship between the percentage of TR-CORE at TAD boundary and the %GC content of the individual CREs within the COREs.
